# Supplementary material for: Moisture and thermal expansion properties and mechanism of interaction between ions of a Nafion-based membrane electrode assembly
Source: Royal Society of Chemistry journal article supplement (doi:10.1039/c7ra04191h), 2017-01-01
Supplement: c7ra04191h1.xlsx [file c7ra04191h1.xlsx]

## Sheet: all data
	sample 1	Nafion 117
试样1	time/min	mass/g	∆m/g	Depth/μm	Length/cm	Width/cm		water content (wt%)	swelling ratio
	immersion
浸泡	0	0.1758	0.0118	186	9.952	0.512		0.0719512	0.116086
	1	0.1903	0.0263	192	10.352	0.52		0.160366	0.217119
	2	0.192	0.028	193	10.401	0.532		0.170732	0.257617
	4	0.1875	0.0235	189	10.382	0.528		0.143293	0.22006
	7	0.1928	0.0288	194	10.382	0.53		0.17561	0.25708
	12	0.1928	0.0288	196	10.41	0.522		0.17561	0.254243
	18	0.1924	0.0284	196	10.412	0.53		0.173171	0.27371
	30	0.1929	0.0289	195	10.42	0.532		0.17622	0.27297
	60	0.1913	0.0273	194	10.324	0.528		0.166463	0.24534
	120	0.1913	0.0273	192	10.206	0.516		0.166463	0.190723
	180	0.1916	0.0276	193	10.202	0.52		0.168293	0.205731
	240	0.1897	0.0257	194	10.21	0.518		0.156707	0.208263
	300	0.19	0.026	192	10.27	0.518		0.158537	0.202834
	1380	0.1911	0.0271	196	10.382	0.516		0.165244	0.236492
	2880	0.1922	0.0282	194	10.242	0.52		0.171951	0.21673
	air dried
晾干	3	0.1825	0.0185	188	9.968	0.515		0.112805	0.136521
	7	0.1765	0.0125	185	9.83	0.512		0.0762195	0.0964771
	11	0.1743	0.0103	183	9.792	0.51		0.0628049	0.07621
	16	0.1748	0.0108	184	9.802	0.508		0.0658537	0.0789482
	20	0.1739	0.0099	184	9.784	0.508		0.0603659	0.0769668
	30	0.1734	0.0094	183	9.71	0.512		0.0573171	0.0713827									V0=0.18*9.522*4.9
	40	0.1726	0.0086	183	9.706	0.51		0.052439	0.066758										lam0	Density	0.0195275
	60	0.1728	0.0088	183	9.708	0.51		0.0536585	0.0669778
	90	0.1722	0.0082	183	9.706	0.508		0.05	0.0625746
	120	0.1722	0.0082	183	9.732	0.512		0.05	0.0738102
	1440	0.1755	0.0115	185	9.762	0.51		0.070122	0.0846386
烘干	dry sample 1	0.164		182	9.522	0.49
	sample 2	Nafion 117
试样2	t	m	∆m	D	L	W		含水量	溶胀率
浸泡	0	0.1828	0.0132	186	9.978	0.522		0.0778302	0.108695
	1	0.1957	0.0261	195	10.374	0.536		0.153892	0.240883
	2	0.2011	0.0315	196	10.4	0.534		0.185731	0.245707
	4	0.1978	0.0282	198	10.408	0.536		0.166274	0.264103
	7	0.2014	0.0318	197	10.51	0.54		0.1875	0.279523
	12	0.2014	0.0318	197	10.546	0.538		0.1875	0.27915
	18	0.2017	0.0321	196	10.522	0.542		0.189269	0.279202
	30	0.2016	0.032	197	10.514	0.536		0.188679	0.270528
	60	0.1965	0.0269	194	10.278	0.53		0.158608	0.209404
	120	0.1996	0.03	194	10.31	0.532		0.176887	0.217748
	180	0.194	0.0244	194	10.184	0.525		0.143868	0.187038
	240	0.1957	0.0261	193	10.216	0.528		0.153892	0.1914
	300	0.1976	0.028	194	10.298	0.532		0.165094	0.21633
	1380	0.1978	0.0282	195	10.334	0.534		0.166274	0.231486
	2880	0.1978	0.0282	196	10.332	0.535		0.166274	0.23988
	air dried
晾干	3	0.1892	0.0196	188	10.022	0.515		0.115566	0.110465
	7	0.1821	0.0125	186	9.856	0.514		0.0737028	0.0783558
	11	0.1802	0.0106	185	9.83	0.514		0.0625	0.0697288
	16	0.1798	0.0102	185	9.812	0.512		0.0601415	0.0636153
	20	0.1799	0.0103	184	9.81	0.514		0.0607311	0.0617818
	30	0.1791	0.0095	183	9.742	0.509		0.0560142	0.03849
	40	0.1781	0.0085	184	9.788	0.508		0.0501179	0.0470341
	60	0.1786	0.009	184	9.792	0.508		0.053066	0.047462
	90	0.1776	0.008	184	9.79	0.51		0.0471698	0.0513711
	120	0.1772	0.0076	184	9.794	0.514		0.0448113	0.06005
	1440	0.1818	0.0122	186	9.994	0.52		0.071934	0.106219
烘干	dry sample 2	0.1696		182	9.564	0.502
	sample 3	Nafion 117
试样3	t	m	∆m	D	L	W		含水量	溶胀率
浸泡	0	0.1735	0.0083	185	9.884	0.52		0.0502421	0.12391
	1	0.1917	0.0265	195	10.248	0.53		0.160412	0.25191
	2	0.1912	0.026	195	10.296	0.522		0.157385	0.238789
	4	0.188	0.0228	192	10.136	0.518		0.138015	0.191575
	7	0.1882	0.023	192	10.208	0.524		0.139225	0.213939
	12	0.1915	0.0263	195	10.198	0.516		0.159201	0.212894
	18	0.1926	0.0274	195	10.3	0.522		0.16586	0.23927
	30	0.1923	0.0271	194	10.298	0.52		0.164044	0.227953
	60	0.1899	0.0247	193	10.12	0.512		0.149516	0.182038
	120	0.1901	0.0249	193	10.144	0.516		0.150726	0.194098
	180	0.1906	0.0254	194	10.168	0.516		0.153753	0.203125
	240	0.1912	0.026	193	10.172	0.518		0.157385	0.202035
	300	0.1916	0.0264	193	10.256	0.52		0.159806	0.216641
	1380	0.191	0.0258	195	10.298	0.519		0.156174	0.231909
	2880	0.1897	0.0245	193	10.204	0.522		0.148305	0.215128
	air dried
晾干	3	0.1842	0.019	189	9.934	0.516		0.115012	0.145142
	7	0.1767	0.0115	185	9.786	0.514		0.0696126	0.0999265
	11	0.1745	0.0093	184	9.752	0.512		0.0562954	0.0859382
	16	0.1734	0.0082	183	9.706	0.514		0.0496368	0.0791408
	20	0.1739	0.0087	182	9.71	0.512		0.0526634	0.0695084
	30	0.1732	0.008	183	9.694	0.51		0.0484262	0.069419
	40	0.1728	0.0076	183	9.69	0.512		0.0460048	0.0731698
	60	0.1727	0.0075	184	9.688	0.512		0.0453995	0.0788114
	90	0.1729	0.0077	183	9.692	0.51		0.0466102	0.0691984
	120	0.1728	0.0076	183	9.696	0.506		0.0460048	0.0612503
	1440	0.1754	0.0102	185	9.868	0.512		0.0617433	0.104827
烘干	dry sample 3	0.1652		182	9.448	0.492

## Sheet: selected data
	Weight/g	V/cm^3	water concent	water concent	swelling	Density	CME
	0.164	0.0849172	0
	0.1728	0.0897275	0.0460048	4.60048	0.0612503	1.92583	1.23132
	0.1739	0.091453	0.0603659	6.03659	0.0769668	1.90152	1.27501
	0.1825	0.0965102	0.112805	11.2805	0.136521	1.89099	1.21024
	0.1882	0.102721	0.139225	13.9225	0.213939	1.83215	1.50589
	0.2014	0.111773	0.1875	18.75	0.279523	1.80187	1.6867
